# Supplementary material
Source: PubMed Central journal article supplement (PMC5638664)
Supplement: NIHMS857358-supplement-supplement_1.pdf [file NIHMS857358-supplement-supplement_1.pdf]

**Supplementary Figure 1.** Expression of SeV RNA in lung (a) and trachea (b) at various time points after infection ( $5 \times 10^4$  pfu). Each bar represents the mean SeV gene expression normalized to *tbp*  $\pm$  SE. Blue bars: *bmal1-wt* (n=4-14 per time point). Red bars: *bmal1<sup>-/-</sup>* littermates (n=4-6 per time point). Each group is composed of equal or near-equal proportions of male and female animals, pooled from 2 independent experiments. \* $p < 0.05$  *bmal1-wt* vs *bmal1<sup>-/-</sup>* (Student's 2-Tailed t-test).

**Supplementary Figure 2.** SeV RNA expression in *per<sup>-/-</sup>* and *wt* mice at 5 days post infection ( $5 \times 10^4$  pfu). Each bar represents the mean SeV gene expression normalized to *tbp*  $\pm$  SE. Black bar: *wt* (n=23). Orange bar: *per2<sup>-/-</sup>* (n=23). Each group is pooled from 4 independent experiments.

**Supplementary Figure 3. (a)** Recombination efficiency in the lungs of tamoxifen-treated *bmal1-iKO* mice as measured by qPCR (see Fig. 2c and methods for a detailed description). Each bar represents the mean *bmal1* recombination index  $\pm$  SE. Dark blue bar: *wt* mice fed tamoxifen-containing chow (n=8). Light blue bar: global *bmal1* heterozygous mice fed regular chow (n=4). Red bar: *bmal1-iKO* mice fed tamoxifen containing chow (n=5). \* $p < 0.05$  tamoxifen-fed *wt* vs tamoxifen-fed *bmal1-iKO* (Student's 2-Tailed t-test). **(b)** Viral RNA expression measured by qPCR at 5 days post inoculation with SeV ( $5 \times 10^4$  pfu). Each bar represents the mean SeV gene expression normalized to *tbp*  $\pm$  SE. Brown bar: *wt* mice fed regular chow (n=4). Blue bar: *wt* mice fed chow containing tamoxifen (n=8). Red bar: *bmal1-iKO* mice fed chow containing tamoxifen (n=5). \* $p < 0.05$  tamoxifen-fed *wt* vs tamoxifen-fed *bmal1-iKO* (Student's 2-Tailed t-test).

**Supplementary Figure 4.** Cellular and inflammatory features of SeV bronchiolitis are similar in *bmal1*<sup>-/-</sup> and *wt* animals. **(a)** Representative micrographs of airways in *bmal1*<sup>-/-</sup> and *wt* lungs at SeV 5 DPI. Green represents Mac3<sup>+</sup> stain, red represents Cleaved Caspase 3, and blue represents DAPI (nuclear stain). **(b-e)** Quantification of granulocyte **(b)**, dendritic cell **(c)**, alveolar macrophage **(d)**, and cytotoxic T-cell **(e)** number using whole lung flow cytometry. Lungs were obtained from SeV infected animals at various days post-infection ( $5 \times 10^4$  pfu). Bars represent mean cell counts per 10,000 events  $\pm$  SE. Blue bars: *bmal1*-*wt* (n=6-12 per time point). Red bars: *bmal1*<sup>-/-</sup> littermates (n=6-12 per time point). Data were pooled from 2 independent experiments utilizing equal proportions of male and female mice. See **Supplementary Fig. 9** for representative gates. <sup>a</sup>p<0.05 versus sham (PBS) infected *wt* controls, <sup>b</sup>p<0.05 *bmal1*<sup>-/-</sup> vs. *wt* (Student's 2-Tailed t-test).

**Supplementary Figure 5.** Gene expression of *ifnb1* **(a)**, *ifnl3*, **(b)** and *ifng* **(c)**. Each bar represents the mean expression normalized to *tbp*  $\pm$  SE at various time points after infection with SeV ( $5 \times 10^4$  pfu). Blue bars: *bmal1*-*wt* (n=4-14 per time point). Red bars: *bmal1*<sup>-/-</sup> littermates (n=4-6 per time point). Each group is composed of equal or near-equal proportions of male and female animals pooled from 2 independent rounds of SeV infection. \*p<0.05 *bmal*-*wt* vs *bmal*<sup>-/-</sup> (Student's 2-Tailed t-test).

**Supplementary Figure 6.** Genotype differences in BAL cytokine concentration at 5 days post SeV infection ( $5 \times 10^4$  pfu) reflect viral RNA expression. **(a)** BAL cytokine concentration at 5 days post infection. Each bar represents the mean concentration of cytokines  $\pm$  SE. Blue bars: *bmal1*-*wt* (n=4-14 per time point). Red bars: *bmal1*<sup>-/-</sup> littermates (n=4-6 per time point). Each group is composed of equal or near-equal proportions of male and female animals pooled from 2 independent rounds of SeV infection. Statistical significance (p<0.05, Student's 2-Tailed t-test)

is denoted by red highlighting of cytokine names. **(b)** BAL cytokine concentration normalized to SeV RNA expression. Each bar represents the mean cytokine concentration normalized to the mean SeV gene expression. SeV gene expression was measured by qPCR and conveyed as a ratio of SeV RNA to *tbp* expression. Blue bars: *bmal1*-*wt* (n=4-14 per time point). Red bars: *bmal1*<sup>-/-</sup> littermates (n=4-6 per time point). Statistical significance ( $p < 0.05$ , Student's 2-Tailed t-test) is denoted by red highlighting of cytokine names. The loss of statistical significance after adjustment for Viral RNA suggests that differences in viral load between SeV -infected *bmal1*<sup>-/-</sup> and *wt* mice can account for the observed differences in cytokine expression.

**Supplementary Figure 7.** Effect of SeV infection time **(a, e)** and sample collection time **(b-d)** on expression of select genes at 49 DPI. **(a)** *muc5ac/tbp* ratios (Mean  $\pm$  SE) in lungs of mice infected with SeV ( $1 \times 10^5$  pfu) at ZT0, ZT6, ZT12, and ZT18, and sacrificed on 49 DPI (n=8-12 per time point). For the purposes of controlling for sample collection time, half of the lungs for each group were collected at ZT0 and half at ZT12. Statistical significance via 1-way ANOVA is shown. Depicted to the right is lung *muc5ac* expression in sham (PBS) treated *bmal1*<sup>-/-</sup> and *wt* male mice (red and black bars, respectively, n=6 per group), SeV infected *wt* mice averaged across all infection and collection times (n=49), and well as SeV infected *bmal1*<sup>-/-</sup> mice ( $5 \times 10^4$  pfu, n=3). <sup>a</sup> $p < 0.05$  SeV-infected vs. PBS control, <sup>b</sup> $p < 0.05$  SeV-infected *wt* vs *bmal1*<sup>-/-</sup> mice (Student's 2-Tailed t-test). **(b)** *muc5ac/tbp* ratios (Mean  $\pm$  SE) in lungs of *wt* male mice infected with SeV at various times ( $1 \times 10^5$  pfu) and sacrificed at either ZT0 and ZT12 on 49 DPI (n=16 per group). For the purposes of controlling for SeV infection time, 4 lungs from each group were infected at ZT0, ZT6, ZT12 and ZT18. **(c)** Temporal expression of *bmal1* in *wt* mouse lungs 49 days post SeV infection (green circles, n=6 per time point, infection time=ZT6), and in untreated control lungs from two independent time series<sup>9</sup> (black diamonds, n=2-3 per time

point). Data points represent the mean expression  $\pm$  SE normalized to *tbp*. The depicted significance values were generated by 1-way ANOVA. Rhythm parameter estimates generated by COSOPT<sup>9</sup> are depicted to the right of the graph. \* $p < 0.05$  SeV-infected *wt* vs. uninfected *wt* obtained at the same sample collection time (Student's 2-Tailed t-test). **(d)** *bmall/tbp* ratios (Mean  $\pm$  SE) in lungs of *wt* male mice infected with SeV at the indicated times ( $1 \times 10^5$  pfu, green bars) and collected on 49 DPI at either ZT0 or ZT12 (n=4-6 per group). For comparison, lung *bmall* expression in untreated mice are depicted in parallel (black bars). Significance values depicted in the panel represent 1-way ANOVA analysis of SeV-infected mice for a given collection time. \* $p < 0.05$  SeV-infected *wt* vs. uninfected *wt* obtained at the same sample collection time (Student's 2-Tailed t-test). **(e)** *il13/tbp* ratios (Mean  $\pm$  SE) in lungs of mice infected with SeV ( $1 \times 10^5$  pfu) at ZT0, ZT6, ZT12, and ZT18, and sacrificed on 49 DPI (n=8-12 per time point). For the purposes of controlling for sample collection time, half of the lungs for each group were collected at ZT0 and half at ZT12. Statistical significance via 1-way ANOVA is shown. Depicted to the right is lung *il13* expression in sham (PBS) treated *bmall*<sup>-/-</sup> and *wt* male mice (red and black bars, respectively, n=6 per group), SeV infected *wt* mice averaged across all infection and collection times (n=49), and well as SeV infected *bmall*<sup>-/-</sup> mice ( $5 \times 10^4$  pfu, n=3). <sup>a</sup> $p < 0.05$  SeV-infected vs. PBS control, <sup>b</sup> $p < 0.05$  SeV-infected *wt* vs *bmall*<sup>-/-</sup> mice (Student's 2-Tailed t-test).

**Supplementary Figure 8.** Quantification of airway collagen in trichrome-stained sections. **(a)** Representative micrographs (left) of trichrome-stained lung sections at 49 days post infection with SeV ( $5 \times 10^4$  pfu) and corresponding marked-up images with collagen staining highlighted in blue (right). **(b)** Quantification of collagen staining. Each bar represents the mean staining index (collagen positive pixels/total pixels in the section)  $\pm$  SE. Blue bars: *bmall*-*wt* (n=4-5). Red bars:

*bmall*<sup>-/-</sup> (n=3-4). <sup>a</sup>p<0.05 SeV-infected *wt* vs sham-treated (PBS) *wt*, <sup>b</sup>p<0.05 sham-treated *wt* vs *bmall*-null (Student's 2-Tailed t-test).

**Supplementary Figure 9.** Log<sub>10</sub> normalized *bmall/nr1d1* expression ratios from SARP participants (Mean ± SE), graphed as a function of collection time. Blue circles: healthy volunteers (n=11). Green triangles: mild/moderate asthma (n=9). Red squares (severe asthma, n=9). A regression line is depicted for the healthy control samples (blue dashed line). Extrapolating from this line, the time difference that would be needed to reproduce the *bmall/nr1d1* expression ratios seen in asthmatic subjects using healthy controls is 3.56 ± 0.36 hours for mild/moderate asthmatics, and 3.70 ± 0.57 hours for severe asthmatics.

**Supplementary Figure 10.** Representative gates used for flow cytometry to quantify granulocytes (a), dendritic cells (b), alveolar macrophages (c), and cytotoxic T-cells (d). Each panel represents the results from 10,000 events. Arrows indicate the quadrants of interest.

## Supplementary Figure 1

## a. Lung

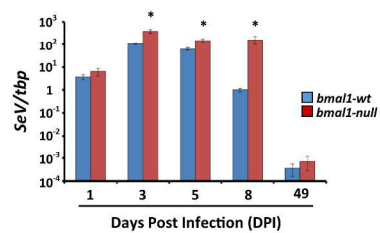

## b. Trachea

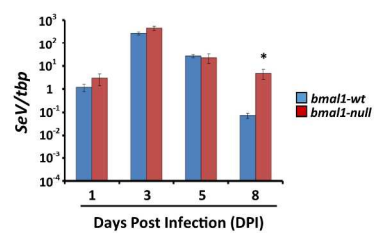

215x279mm (300 x 300 DPI)

Supplementary Figure 2

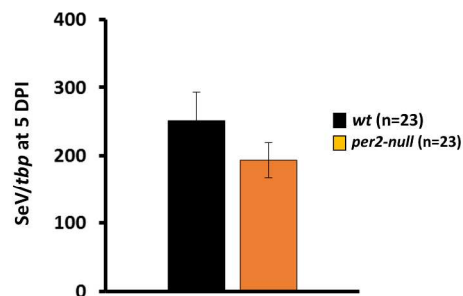

215x279mm (300 x 300 DPI)

## Supplementary Figure 3

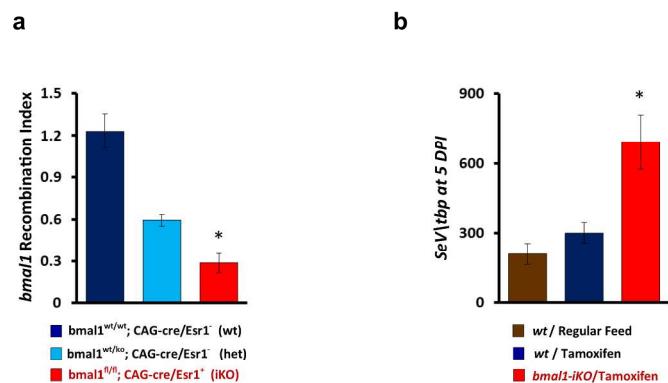

215x279mm (300 x 300 DPI)



Supplementary Figure 4

**a** Acute SeV Bronchiolitis Histology, 5 DPI

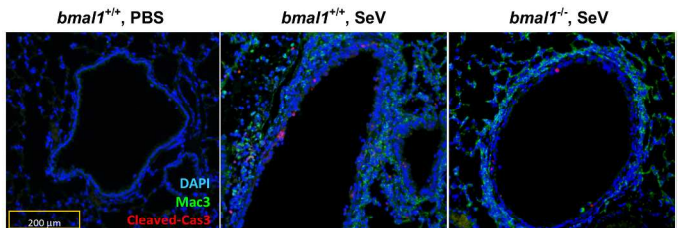

**b** Granulocytes (CD11b<sup>+</sup>,GR1<sup>+</sup>)

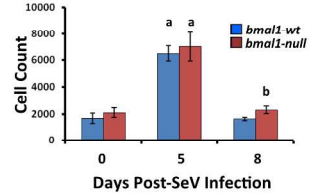

**c** Dendritic Cells (CD11c<sup>+</sup>, Siglac F<sup>+</sup>)

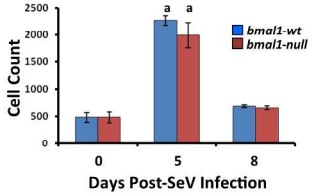

**d** Alveolar Macrophages (CD11c<sup>+</sup>,Siglac-F<sup>+</sup>)

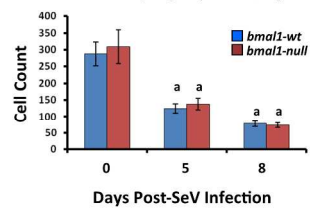

**e** Cytotoxic T-Cells (CD45<sup>+</sup>,CD8<sup>+</sup>)

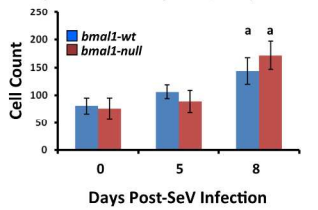

215x279mm (300 x 300 DPI)

Supplementary Figure 5

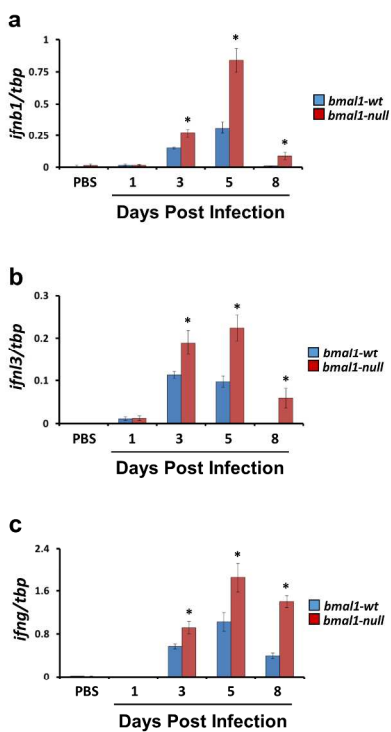

215x279mm (300 x 300 DPI)

Supplementary Figure 6

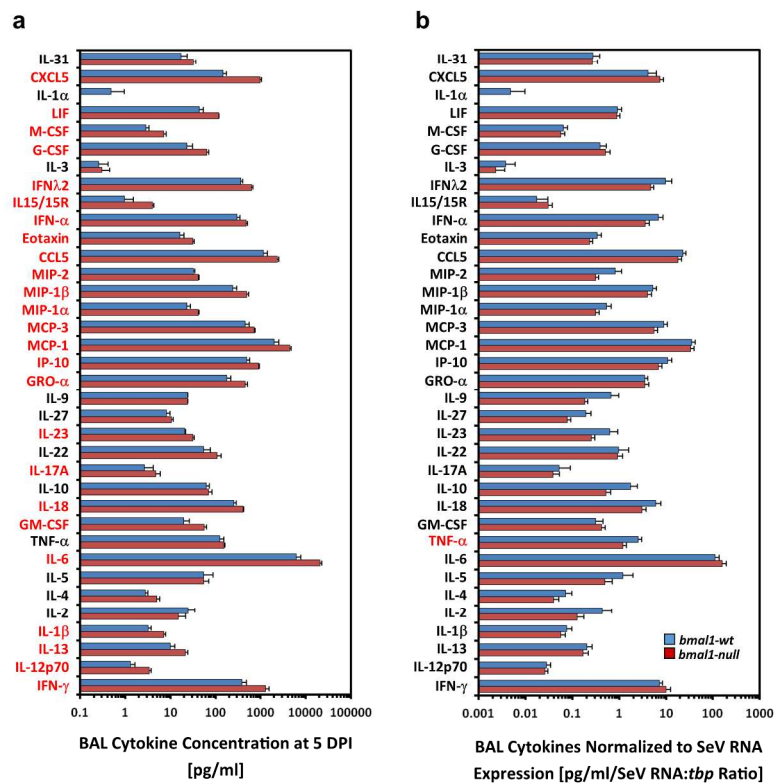

215x279mm (300 x 300 DPI)

## Supplementary Figure 7

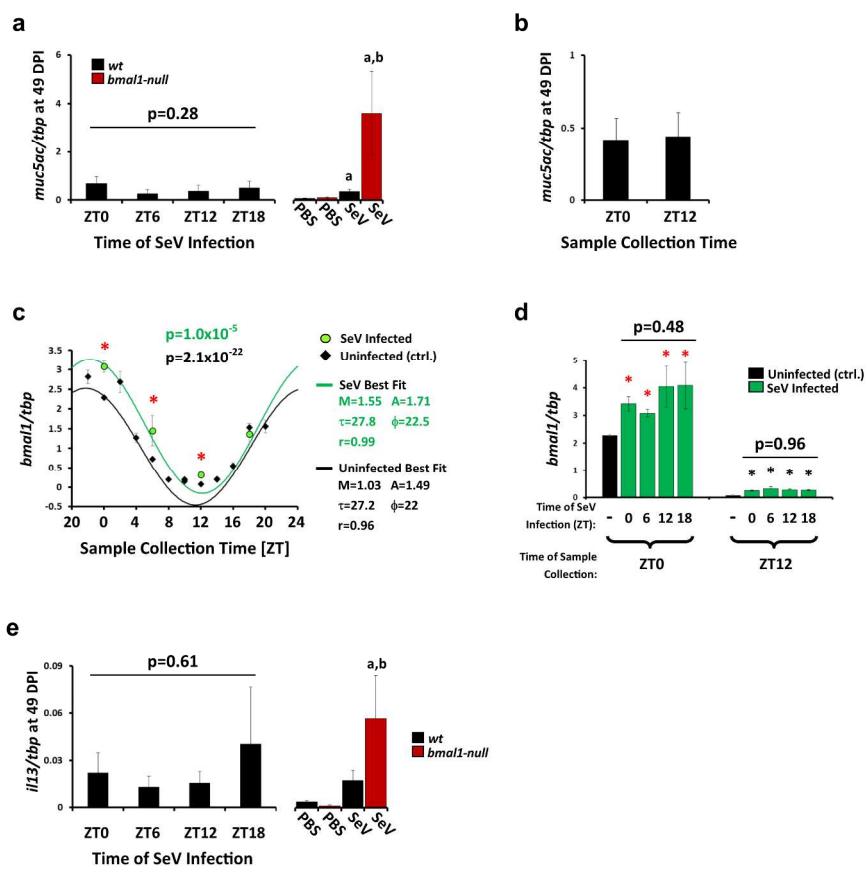

215x279mm (300 x 300 DPI)

Supplementary Figure 8

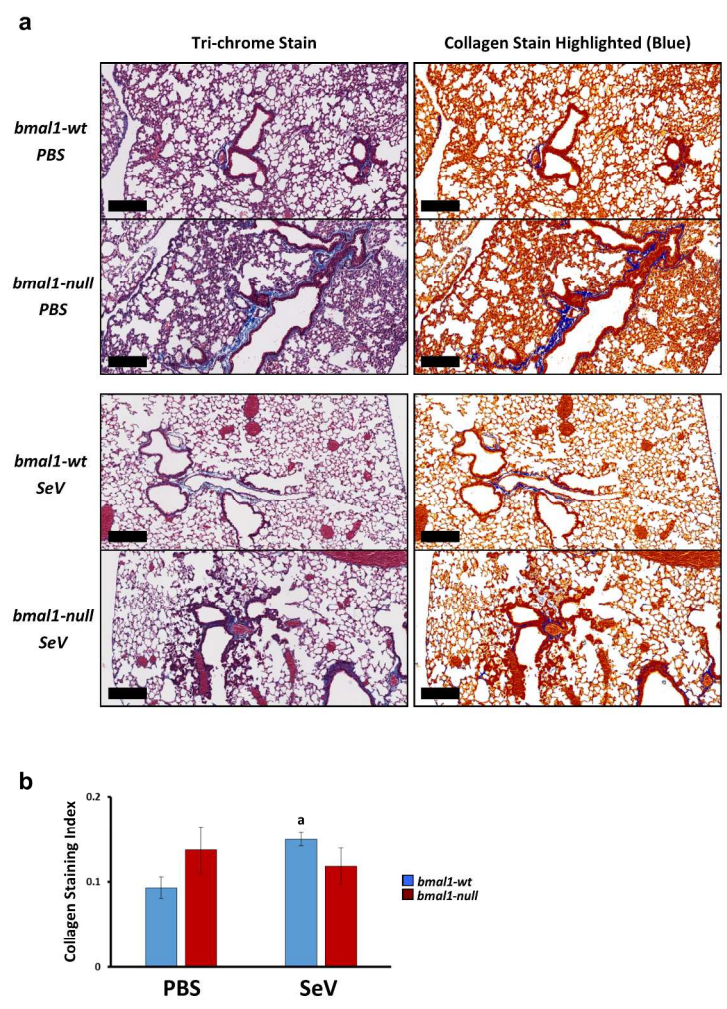

215x279mm (300 x 300 DPI)

Supplemental Figure 9

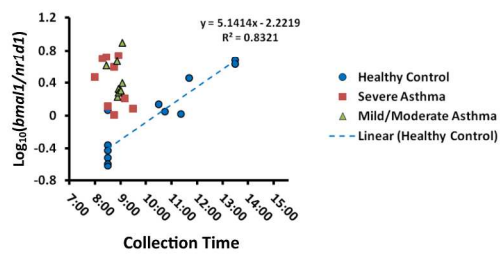

215x279mm (300 x 300 DPI)

Supplementary Figure 10

**a** Granulocytes (CD45<sup>+</sup>, CD11b<sup>+</sup>, GR1<sup>+</sup>)

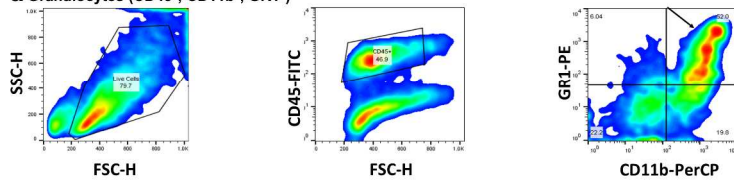

**b** Dendritic Cells (CD45<sup>+</sup>, CD11c<sup>+</sup>, Siglec F)

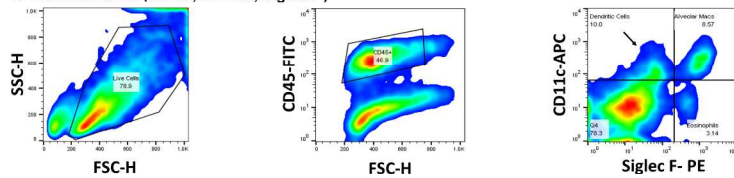

**c** Alveolar Macrophages (CD45<sup>+</sup>, CD11c<sup>+</sup>, Siglec F<sup>+</sup>)

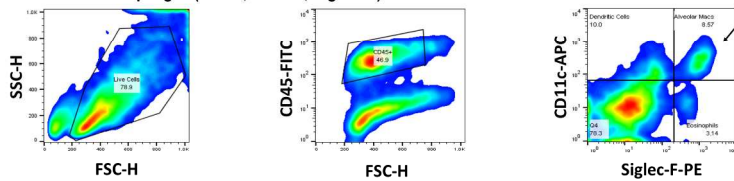

**d** Cytotoxic T-Cells (CD45<sup>+</sup>, CD4<sup>+</sup>, CD8<sup>+</sup>)

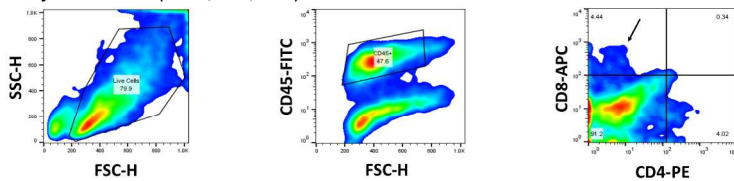

215x279mm (300 x 300 DPI)

**Supplementary Table 1.** BAL cytokine measurements from SeV infected *bmal1*<sup>-/-</sup> and *bmal1*<sup>+/+</sup> mice. Values represent mean concentrations in pg/ml and SE are depicted in parentheses. Values where cytokine levels are significantly changed from baseline controls (p<0.05, 2-tailed t-test) are bolded. Significant differences (p<0.05, 2-tailed t-test) between *bmal1*<sup>-/-</sup> and *bmal1*<sup>+/+</sup> mice are highlighted in yellow.

|                        | <i>bmal1</i> <sup>+/+</sup> |                   |                                   |                                    |                                   | <i>bmal1</i> <sup>-/-</sup>   |                                     |                                     |                                   |
|------------------------|-----------------------------|-------------------|-----------------------------------|------------------------------------|-----------------------------------|-------------------------------|-------------------------------------|-------------------------------------|-----------------------------------|
| Day Post SeV Challenge | PBS Ctrl                    | 1                 | 3                                 | 5                                  | 8                                 | 1                             | 3                                   | 5                                   | 8                                 |
| IFN-gamma              | 3.84<br>(0.69)              | 2.4<br>(0.23)     | <b>93.75</b><br><b>(25.98)</b>    | <b>381.8</b><br><b>(98.98)</b>     | 236.93<br>(91.21)                 | 2.83<br>(0.16)                | <b>183.54</b><br><b>(33.47)</b>     | <b>1297.71</b><br><b>(238.02)</b>   | <b>1768.61</b><br><b>(309.65)</b> |
| IL-12p70               | 0.35<br>(0.12)              | 2.83<br>(0.83)    | <b>4.58</b><br><b>(0.49)</b>      | 1.31<br>(0.31)                     | 0.44<br>(0.19)                    | <b>0 (0)</b>                  | <b>4.78</b><br><b>(1.29)</b>        | <b>3.42</b><br><b>(0.28)</b>        | 0.91<br>(0.27)                    |
| IL-13                  | 0.3 (0.3)                   | 0 (0)             | <b>15.4</b><br><b>(1.31)</b>      | <b>9.81</b><br><b>(2.69)</b>       | 4.4<br>(1.69)                     | 0.05<br>(0.05)                | <b>23.32</b><br><b>(3.65)</b>       | <b>21.43</b><br><b>(2.48)</b>       | <b>14.36</b><br><b>(0.79)</b>     |
| IL-1beta               | 0.22<br>(0.22)              | 0.36<br>(0.21)    | <b>9.24</b><br><b>(0.77)</b>      | <b>3.23</b><br><b>(0.53)</b>       | <b>1.96</b><br><b>(0.39)</b>      | 0.38<br>(0.22)                | <b>6.33</b><br><b>(0.52)</b>        | <b>7.18</b><br><b>(0.56)</b>        | <b>4.32</b><br><b>(0.63)</b>      |
| IL-2                   | 0 (0)                       | 9.36<br>(9.36)    | 0 (0)                             | 24.59<br>(10.44)                   | 0 (0)                             | 0 (0)                         | 0 (0)                               | 14.88<br>(6.9)                      | 0 (0)                             |
| IL-4                   | 2.11<br>(0.51)              | 1.38<br>(0.24)    | 3.19<br>(0.43)                    | 2.83<br>(0.35)                     | 1.85<br>(0.11)                    | 1.85<br>(0.28)                | <b>3.86</b><br><b>(0.35)</b>        | <b>4.96</b><br><b>(0.77)</b>        | 2.55<br>(0.13)                    |
| IL-5                   | 1.94<br>(0.66)              | 3.98<br>(0.75)    | <b>98.14</b><br><b>(11.92)</b>    | 54.34<br>(32.86)                   | <b>8.36</b><br><b>(1.41)</b>      | 7 (3.4)                       | 282.48<br>(92.42)                   | 54.39<br>(15.81)                    | <b>19.37</b><br><b>(1.86)</b>     |
| IL-6                   | 35.53<br>(25.67)            | 116.67<br>(52.08) | <b>11564.6</b><br><b>(254.45)</b> | <b>6121.93</b><br><b>(1641.17)</b> | <b>1295.53</b><br><b>(308.61)</b> | 189.23<br>(59.23)             | <b>11614.03</b><br><b>(1062.73)</b> | <b>21007.11</b><br><b>(1585.85)</b> | <b>5913.57</b><br><b>(560.27)</b> |
| TNF-alpha              | 3.52<br>(0.91)              | 11.18<br>(3.73)   | <b>260.16</b><br><b>(27.77)</b>   | <b>125.49</b><br><b>(28.57)</b>    | <b>67.3</b><br><b>(10.2)</b>      | <b>14.18</b><br><b>(3.39)</b> | <b>215.11</b><br><b>(13.45)</b>     | <b>155.09</b><br><b>(5.59)</b>      | <b>135.77</b><br><b>(18.49)</b>   |
| GM-CSF                 | 1.7 (1.7)                   | 1.43<br>(1.43)    | <b>56.57</b><br><b>(5.03)</b>     | 19.81<br>(6.62)                    | 6.7<br>(4.05)                     | 5.01<br>(1.73)                | <b>42.1</b><br><b>(2.16)</b>        | <b>56.58</b><br><b>(6.24)</b>       | <b>30.59</b><br><b>(0.97)</b>     |
| IL-18                  | 115.23<br>(33.38)           | 125.47<br>(12.94) | <b>325.83</b><br><b>(14.39)</b>   | <b>252.65</b><br><b>(33.29)</b>    | 180.47<br>(13.96)                 | 101.1<br>(6.24)               | <b>301.85</b><br><b>(33.93)</b>     | <b>404.09</b><br><b>(23.78)</b>     | <b>291.75</b><br><b>(10.55)</b>   |



|            |                   |                                |                                   |                                   |                                 |                                 |                                  |                                   |                                   |
|------------|-------------------|--------------------------------|-----------------------------------|-----------------------------------|---------------------------------|---------------------------------|----------------------------------|-----------------------------------|-----------------------------------|
| IL-10      | 428.67<br>(84.13) | <b>91.35</b><br><b>(25.41)</b> | <b>38.98</b><br><b>(21.75)</b>    | <b>63.14</b><br><b>(10.28)</b>    | <b>39.97</b><br><b>(9.46)</b>   | <b>151.59</b><br><b>(22.83)</b> | <b>85.7</b><br><b>(38.99)</b>    | <b>70.55</b><br><b>(13.3)</b>     | 228.24<br>(60.85)                 |
| IL-17A     | 0 (0)             | 0 (0)                          | <b>2.2</b><br><b>(0.23)</b>       | 2.64<br>(1.52)                    | 0.25<br>(0.23)                  | 0 (0)                           | <b>3.75</b><br><b>(1.01)</b>     | <b>4.7</b> (1.26)                 | <b>2.56</b><br><b>(0.4)</b>       |
| IL-22      | 0 (0)             | 0 (0)                          | <b>56.75</b><br><b>(7.44)</b>     | 54 (23.95)                        | 8.56<br>(7.73)                  | 0 (0)                           | 31 (10.67)                       | <b>108.74</b><br><b>(25.63)</b>   | <b>44.23</b><br><b>(6.12)</b>     |
| IL-23      | 71.12<br>(38.32)  | 9.93<br>(6.03)                 | 33.61<br>(2.28)                   | 21 (0.52)                         | 9.39<br>(4.13)                  | <b>38.02</b><br><b>(2.94)</b>   | 60.6<br>(13.7)                   | 31.86<br>(1.93)                   | 53.39<br>(9.41)                   |
| IL-27      | 2.03<br>(0.45)    | 37.74<br>(35.05)               | <b>9.5</b><br><b>(1.71)</b>       | <b>8.09</b><br><b>(1.72)</b>      | <b>6.56</b><br><b>(0.22)</b>    | 13.91<br>(6.27)                 | <b>7.23</b><br><b>(0.48)</b>     | <b>10.36</b><br><b>(1.06)</b>     | <b>16.21</b><br><b>(2.35)</b>     |
| IL-9       | 24.07<br>(0.93)   | 23.26<br>(0.18)                | 25.48<br>(0.5)                    | 23.66<br>(0.83)                   | <b>21.92</b><br><b>(0.18)</b>   | 23.89<br>(0.33)                 | <b>37.96</b><br><b>(3.37)</b>    | 23.77<br>(0.24)                   | 23.29<br>(0.29)                   |
| GRO-alpha  | 14.63<br>(0.47)   | 17.36<br>(2.6)                 | <b>362.79</b><br><b>(35.59)</b>   | <b>177.07</b><br><b>(40.78)</b>   | <b>145.18</b><br><b>(31.35)</b> | <b>30.93</b><br><b>(5.17)</b>   | <b>471.33</b><br><b>(46.43)</b>  | <b>452.82</b><br><b>(58.56)</b>   | <b>249.64</b><br><b>(51.1)</b>    |
| IP-10      | 6.92<br>(0.54)    | 40.71<br>(13.55)               | <b>720.91</b><br><b>(28.75)</b>   | <b>489.9</b><br><b>(89.1)</b>     | <b>154.8</b><br><b>(34.85)</b>  | 51.08<br>(15.62)                | <b>860.47</b><br><b>(53.53)</b>  | <b>901.91</b><br><b>(32.47)</b>   | <b>666.15</b><br><b>(108.41)</b>  |
| MCP-1      | 5.05<br>(5.05)    | 28.32<br>(17.77)               | <b>2544.43</b><br><b>(223.47)</b> | <b>1998</b><br><b>(556)</b>       | 600.63<br>(247.53)              | 5.46<br>(3.16)                  | <b>2712.6</b><br><b>(273.34)</b> | <b>4420.68</b><br><b>(367.98)</b> | <b>4217.38</b><br><b>(988.32)</b> |
| MCP-3      | 5.65<br>(0.35)    | 3.74<br>(1.19)                 | <b>521.76</b><br><b>(49.14)</b>   | <b>449.42</b><br><b>(102.47)</b>  | <b>362.92</b><br><b>(76.57)</b> | 8.63<br>(1.71)                  | <b>534.37</b><br><b>(28.72)</b>  | <b>725.99</b><br><b>(34.03)</b>   | <b>787.75</b><br><b>(61.01)</b>   |
| MIP-1alpha | 0.13<br>(0.13)    | 1.75<br>(1.63)                 | <b>30.38</b><br><b>(3.67)</b>     | <b>23.55</b><br><b>(3.93)</b>     | <b>18.38</b><br><b>(4.4)</b>    | 1.68<br>(0.57)                  | <b>27.18</b><br><b>(2.21)</b>    | <b>41.09</b><br><b>(1.85)</b>     | <b>120.89</b><br><b>(10.35)</b>   |
| MIP-1beta  | 7.93<br>(2.14)    | 14.22<br>(3.92)                | <b>362.23</b><br><b>(28.98)</b>   | <b>243.75</b><br><b>(50.16)</b>   | 133.96<br>(44.92)               | 20.88<br>(4.15)                 | <b>329.83</b><br><b>(59.1)</b>   | <b>497.44</b><br><b>(45.3)</b>    | <b>638.82</b><br><b>(53.62)</b>   |
| MIP-2      | 29.46<br>(6.07)   | 19.71<br>(1.84)                | <b>45.92</b><br><b>(1.14)</b>     | 31.93<br>(2.75)                   | 18.34<br>(3.12)                 | 25<br>(1.56)                    | <b>52.1</b><br><b>(2.05)</b>     | <b>41.51</b><br><b>(1.45)</b>     | 43.09<br>(4.01)                   |
| RANTES     | 0 (0)             | 4.65<br>(3.26)                 | <b>1499.79</b><br><b>(99.74)</b>  | <b>1166.01</b><br><b>(267.78)</b> | <b>145.65</b><br><b>(21.57)</b> | 1.69<br>(1.69)                  | <b>1188.85</b><br><b>(94.01)</b> | <b>2385.05</b><br><b>(124.87)</b> | <b>1149.7</b><br><b>(171.74)</b>  |
| Eotaxin    | 18.62<br>(2.5)    | <b>4.95</b><br><b>(0.88)</b>   | <b>40.29</b><br><b>(6.44)</b>     | 16.18<br>(3.8)                    | <b>8.92</b><br><b>(1.7)</b>     | <b>11.8</b><br><b>(0.8)</b>     | <b>111.7</b><br><b>(9.72)</b>    | <b>31.47</b><br><b>(2.6)</b>      | 83.78<br>(27.6)                   |

|                     |                   |                  |                                 |                                 |                               |                                 |                                  |                                 |                                 |
|---------------------|-------------------|------------------|---------------------------------|---------------------------------|-------------------------------|---------------------------------|----------------------------------|---------------------------------|---------------------------------|
| <b>IFN-alpha</b>    | 0 (0)             | 5.14<br>(4.05)   | <b>341.43</b><br><b>(25.95)</b> | <b>297.78</b><br><b>(49.93)</b> | <b>19.12</b><br><b>(6.22)</b> | 5.03<br>(3.13)                  | <b>283.73</b><br><b>(32.71)</b>  | <b>479.57</b><br><b>(29.72)</b> | <b>63.72</b><br><b>(7.42)</b>   |
| <b>IL-15/IL-15R</b> | 0 (0)             | 0 (0)            | <b>4.84</b><br><b>(0.18)</b>    | 0.95<br>(0.58)                  | 0 (0)                         | 0.09<br>(0.09)                  | <b>3.14</b><br><b>(0.27)</b>     | <b>4 (0.33)</b>                 | 2.05<br>(0.71)                  |
| <b>IL-28</b>        | 177.77<br>(41.43) | 75.04<br>(25.11) | <b>592.34</b><br><b>(49.68)</b> | <b>365.87</b><br><b>(35.95)</b> | 125.88<br>(10.59)             | <b>145.66</b><br><b>(10.07)</b> | <b>618.89</b><br><b>(110.1)</b>  | <b>631.02</b><br><b>(40.56)</b> | 307.87<br>(42.68)               |
| <b>IL-3</b>         | 0.41<br>(0.06)    | 0.3 (0.3)        | 0.27<br>(0.18)                  | 0.25<br>(0.16)                  | <b>0 (0)</b>                  | 0.76<br>(0.17)                  | 0.4 (0.11)                       | 0.3 (0.15)                      | 0.17<br>(0.08)                  |
| <b>G-CSF</b>        | 0.45<br>(0.33)    | 1.4<br>(0.87)    | <b>49.64</b><br><b>(1.4)</b>    | <b>23.48</b><br><b>(7.52)</b>   | <b>8.79</b><br><b>(2.09)</b>  | 7.34<br>(3.98)                  | <b>129</b><br><b>(10.91)</b>     | <b>63.83</b><br><b>(7.06)</b>   | <b>148.59</b><br><b>(43.26)</b> |
| <b>M-CSF</b>        | 0.13<br>(0.02)    | 0.22<br>(0.06)   | <b>19.56</b><br><b>(1.8)</b>    | <b>2.88 (0.5)</b>               | 0.6<br>(0.32)                 | 0.19<br>(0.04)                  | <b>9.71</b><br><b>(2.82)</b>     | <b>7.1 (0.97)</b>               | <b>10.07</b><br><b>(1.54)</b>   |
| <b>LIF</b>          | 0 (0)             | 0 (0)            | <b>65.49</b><br><b>(6.46)</b>   | <b>43.33</b><br><b>(9.98)</b>   | 9.15<br>(3.44)                | 0 (0)                           | <b>60.93</b><br><b>(17.9)</b>    | <b>117.03</b><br><b>(3.76)</b>  | <b>124.21</b><br><b>(14.31)</b> |
| <b>IL-1alpha</b>    | 0 (0)             | 0 (0)            | 0.28<br>(0.28)                  | 0.48<br>(0.48)                  | 0 (0)                         | 0 (0)                           | 0 (0)                            | 0 (0)                           | 0 (0)                           |
| <b>ENA-78</b>       | 137.27<br>(34.74) | 48.23<br>(30.4)  | <b>573.88</b><br><b>(68.53)</b> | 148.36<br>(27.01)               | <b>22.7</b><br><b>(18.65)</b> | <b>238.74</b><br><b>(21.42)</b> | <b>1070.04</b><br><b>(95.26)</b> | <b>978.89</b><br><b>(72.12)</b> | <b>281.21</b><br><b>(25.65)</b> |
| <b>IL-31</b>        | 3.9<br>(2.54)     | 4.82<br>(2.78)   | <b>27.31</b><br><b>(0.87)</b>   | 17.11<br>(6.18)                 | 1.08<br>(1.08)                | 8.19<br>(3.09)                  | <b>23.7</b><br><b>(2.36)</b>     | <b>32.43</b><br><b>(4.11)</b>   | <b>29.57</b><br><b>(3.53)</b>   |
| <b>Sample n</b>     | 3                 | 4                | 4                               | 4                               | 4                             | 4                               | 4                                | 6                               | 5                               |

**Supplementary Table 2:** demographics of SARP adult participants and healthy adult control subjects.

| <b>Cohort</b>               | <b>Gender</b> | <b>Ethnicity</b> | <b>Age At Sample Collection [Yrs.]</b> | <b>Frequency of Nocturnal Symptoms</b> | <b>Steroid Containing Medications (Name, Dose, and Frequency)</b> | <b>Time of Day Sample Was Collected</b> |
|-----------------------------|---------------|------------------|----------------------------------------|----------------------------------------|-------------------------------------------------------------------|-----------------------------------------|
| <b>Healthy Control</b>      | Male          | African-American | 20                                     | -                                      | -                                                                 | 8:30                                    |
| <b>Healthy Control</b>      | Male          | African-American | 20                                     | -                                      | -                                                                 | 8:30                                    |
| <b>Healthy Control</b>      | Male          | African-American | 28                                     | -                                      | -                                                                 | 8:30                                    |
| <b>Healthy Control</b>      | Male          | Caucasian        | 23                                     | -                                      | -                                                                 | 8:30                                    |
| <b>Healthy Control</b>      | Male          | Caucasian        | 20                                     | -                                      | -                                                                 | 8:30                                    |
| <b>Healthy Control</b>      | Male          | African-American | 44                                     | -                                      | -                                                                 | 8:30                                    |
| <b>SARP-mild asthma</b>     | Female        | Caucasian        | 56                                     | none                                   | Albuterol Only                                                    | 0853am                                  |
| <b>SARP-mild asthma</b>     | Female        | Caucasian        | 26                                     | none                                   | Albuterol Only                                                    | 0857am                                  |
| <b>SARP-mild asthma</b>     | Male          | African-American | 47                                     | 1-2 x a month                          | QVAR 80 mcg 2 puffs BID                                           | 0827am                                  |
| <b>SARP-mild asthma</b>     | Female        | African-American | 46                                     | none                                   | Albuterol Only                                                    | 0855am                                  |
| <b>SARP-mild asthma</b>     | Male          | African-American | 44                                     | 1-2 x a month                          | Albuterol Only                                                    | 0856am                                  |
| <b>SARP-moderate asthma</b> | Female        | African-American | 48                                     | none                                   | Pulmicort 180 mcg 1 puff BID                                      | 0905am                                  |
| <b>SARP-moderate asthma</b> | Female        | Caucasian        | 65                                     | 1-2 x a month                          | Advair 250/50 mcg 1 puff BID                                      | 0905am                                  |
| <b>SARP-moderate asthma</b> | Female        | Caucasian        | 53                                     | none                                   | Advair 100/50 mcg 1 puff BID                                      | 0852am                                  |
| <b>SARP-moderate</b>        | Female        | African-         | 35                                     | 1-2 x a month                          | Fluticasone                                                       | 0901am                                  |

|                           |        |                  |    |                |                                                                                  |      |
|---------------------------|--------|------------------|----|----------------|----------------------------------------------------------------------------------|------|
| <b>asthma</b>             |        | American         |    |                | 110 mcg 1 puff BID                                                               |      |
| <b>SARP-severe asthma</b> | Female | Caucasian        | 29 | 2 to 3/Week    | Dulera 200/5 mcg 2 puffs BID                                                     | 8:45 |
| <b>SARP-severe asthma</b> | Female | African-American | 38 | 2 to 3/Week    | Symbicort 160/4.5 mcg 2 puffs BID                                                | 8:00 |
| <b>SARP-severe asthma</b> | Male   | African-American | 59 | 2 to 3/Week    | Symbicort 160/4.5 mcg 2 puffs BID                                                | 8:30 |
| <b>SARP-severe asthma</b> | Female | Caucasian        | 60 | 4 or More/Week | Dulera 200/5 mcg 2 puffs BID                                                     | 8:55 |
| <b>SARP-severe asthma</b> | Female | African-American | 58 | 4 or More/Week | Advair 230/21 mcg 2 puffs BID, Alvesco 160 mcg 2 puffs BID, Pulmicort 1 puff BID | 8:27 |
| <b>SARP-severe asthma</b> | Male   | African-American | 32 | 4 or More/Week | Advair 500/50 mcg 1 puff BID                                                     | 8:18 |
| <b>SARP-severe asthma</b> | Female | African-American | 32 | 4 or More/Week | Advair 500/50 mcg 1 puff BID                                                     | 9:30 |
| <b>SARP-severe asthma</b> | Female | Caucasian        | 35 | 2 to 3/Week    | Advair 500/50 mcg 1 puff BID                                                     | 9:10 |
| <b>SARP-severe asthma</b> | Female | African-American | 51 | 4 or More/Week | Symbicort 160/4.5 mcg 2 puffs BID                                                | 8:45 |

**Supplementary Table 3:** demographics of pediatric RBEL-II participants and healthy pediatric control subjects.

| Cohort          | Gender | Ethnicity        | Age At Sample Collection [Yrs.] | Age at Hospitalization For Bronchiolitis [Days] | Length of Hospital Stay [Days] | Lowest Oxygen Saturation Recorded During Hospitalization [%] | Length of Time After Hospital Discharge That Sample Was Collected [Days] | Steroid Containing Medications (Name, Dose, and Frequency) | Time of Day Sample Was Collected | Recurrent Wheezing Episodes | MD Diagnosed Asthma By Age 3 |
|-----------------|--------|------------------|---------------------------------|-------------------------------------------------|--------------------------------|--------------------------------------------------------------|--------------------------------------------------------------------------|------------------------------------------------------------|----------------------------------|-----------------------------|------------------------------|
| RBEL-II         | M      | African-american | 1.2                             | 94                                              | 10                             | 60                                                           | 340                                                                      | -                                                          | 10:30                            | Yes                         | Yes                          |
| RBEL-II         | M      | Multi-Ethnic     | 0.7                             | 224                                             | 6                              | 88                                                           | 26                                                                       | -                                                          | 10:15                            | Yes                         | No                           |
| RBEL-II         | M      | Multi-Ethnic     | 0.3                             | 73                                              | 5                              | 91                                                           | 52                                                                       | -                                                          | 11:30                            | No                          | No                           |
| RBEL-II         | M      | Caucasian        | 0.2                             | 40                                              | 6                              | 77                                                           | 29                                                                       | -                                                          | 12:20                            | Yes                         | Yes                          |
| RBEL-II         | F      | African-american | 0.3                             | 23                                              | 8                              | 77                                                           | 80                                                                       | -                                                          | 10:45                            | Yes                         | Yes                          |
| RBEL-II         | F      | African-american | 1.0                             | 211                                             | 4                              | 84                                                           | 146                                                                      | -                                                          | 11:30                            | Yes                         | No                           |
| RBEL-II         | M      | African-american | 1.0                             | 320                                             | 5                              | 86                                                           | 32                                                                       | -                                                          | 11:30                            | Yes                         | Yes                          |
| RBEL-II         | F      | African-american | 0.6                             | 101                                             | 5                              | 85                                                           | 108                                                                      | -                                                          | 11:20                            | Yes                         | No                           |
| RBEL-II         | M      | Caucasian        | 0.2                             | 28                                              | 5                              | 84                                                           | 52                                                                       | -                                                          | 10:50                            | Yes                         | No                           |
| RBEL-II         | M      | Caucasian        | 0.2                             | 31                                              | 5                              | 84                                                           | 40                                                                       | -                                                          | 10:35                            | Yes                         | No                           |
| Healthy Control | F      | Caucasian        | 2.6                             | -                                               | -                              | -                                                            | -                                                                        | -                                                          | 10:25                            | No                          | -                            |
| Healthy Control | M      | Multi-Ethnic     | 2.6                             | -                                               | -                              | -                                                            | -                                                                        | -                                                          | 11:25                            | No                          | -                            |
| Healthy Control | F      | African-american | 4.0                             | -                                               | -                              | -                                                            | -                                                                        | -                                                          | 10:50                            | No                          | -                            |

|                        |   |              |     |   |   |   |   |   |       |    |   |
|------------------------|---|--------------|-----|---|---|---|---|---|-------|----|---|
| <b>Healthy Control</b> | M | Multi-Ethnic | 2.7 | - | - | - | - | - | 11:26 | No | - |
| <b>Healthy Control</b> | F | Caucasian    | 2.7 | - | - | - | - | - | 10:30 | No | - |

**Supplementary Table 4:** primers used for qPCR analysis.

| Gene symbol                    | Manufacturer | Catalog number      |
|--------------------------------|--------------|---------------------|
| <i>muc5ac</i>                  | IDT          | Mm.PT.58.42279692   |
| <i>gapdh</i>                   | IDT          | Mm.PT.39a.1         |
| <i>adm</i>                     | IDT          | Mm.PT.58.11111908.g |
| <i>il-13</i>                   | IDT          | Mm.PT.58.31366752   |
| <i>clock</i>                   | IDT          | Mm.PT.58.6936121    |
| <i>ifit1</i>                   | IDT          | Mm.PT.58.32674307   |
| <i>ifit2</i>                   | IDT          | Mm.PT.58.28800045.g |
| <i>ifit3</i>                   | IDT          | Mm.PT.58.33537107   |
| <i>ifnb1</i>                   | IDT          | Mm.PT.58.30132453.g |
| <i>ifi44l</i>                  | IDT          | Mm.PT.58.50506267   |
| <i>ifi202b</i>                 | IDT          | Mm.PT.58.46059509   |
| <i>tbp</i>                     | IDT          | Mm.PT.58.10867035   |
| <i>tbp</i>                     | IDT          | Mm.PT.39a22214839   |
| <i>il-33</i>                   | IDT          | Mm.PT.58.12022572   |
| <i>dbp</i>                     | IDT          | Mm.PT.58.16911772   |
| <i>spon2</i>                   | Invitrogen   | Mm00513596_m1       |
| <i>arntl</i>                   | Invitrogen   | Mm00500226_m1       |
| <i>actb</i>                    | Invitrogen   | Mm00607939_s1       |
| <i>arntl</i>                   | IDT          | Hs.PT.56a.2365270.g |
| <i>dbp</i>                     | IDT          | Hs.PT.58.22507169   |
| <i>npas2</i>                   | IDT          | Hs.PT.58.1532958    |
| <i>per2</i>                    | IDT          | Hs.PT.58.3464649    |
| <i>nr1d1</i>                   | IDT          | Hs.PT.58.40288679   |
| <i>nr1d2</i>                   | IDT          | Hs.PT.58.28261906   |
| <i>rplp0</i>                   | IDT          | Hs.PT.58.20222060   |
| <i>mrpl9</i>                   | IDT          | Hs.PT.58.39157887   |
| <i>vcp</i>                     | IDT          | Hs.PT.58.24735060   |
| <i>spon2</i>                   | IDT          | Hs.PT.58.14889671   |
| <i>trem2</i>                   | Invitrogen   | Mm04209424_g1       |
| <i>arntl exon location 5-8</i> | IDT          | Mm.Pt.58.21961100   |
| <i>arntl exon location 8-9</i> | IDT          | Mm.Pt.58.43977824   |

**Supplementary Table 5:** antibodies used for flow cytometry.

| Antibody                                   | Clone    | Vendor/Cat #           |
|--------------------------------------------|----------|------------------------|
| Anti-Mouse CD45 FITC                       | 30-F11   | eBioscience 11-0451-82 |
| Anti-Mouse CD68 PE                         | FA-11    | eBioscience 12-0681-80 |
| Anti-Mouse CD19 APC                        | eBio1D3  | eBioscience 17-0193-80 |
| Anti-Mouse CD19 Per-CP Cy-5.5              | eBio1D3  | eBioscience 45-0193-80 |
| Anti-Mouse CD335 (NKp46) PE                | 29A1.4   | eBioscience 12-3351-80 |
| Anti-Mouse CD49b (Integrin $\alpha$ 2) APC | DX5      | eBioscience 17-5971-81 |
| Anti-Mouse CD3e FITC                       | 145-2C11 | eBioscience 11-0031-82 |
| Anti-Mouse NK1.1 PE                        | PK136    | eBioscience 12-5941-81 |
| Anti-Mouse CD324 (E-Cadherin) eFluor 660   | DECMA-1  | eBioscience 50-3249-80 |
| Anti-Mouse CD31 PE                         | 390      | eBioscience 12-031-81  |
| Anti-Mouse Siglec-F-PE                     | E50-2440 | BD Biosciences 552126  |
| Anti-Mouse CD11c APC                       | N418     | eBioscience 17-0114-81 |
| Anti-Mouse Ly-6G & Ly6C-PE                 | RB6-8C5  | BD Biosciences 553128  |
| Anti-Mouse CD11b PerCP Cy-5.5              | M1/70    | eBioscience 45-0112-80 |
| Anti-Mouse CD4 PE                          | GK1.5    | eBioscience 12-0041-81 |
| Anti-Mouse CD8a APC                        | 53-6.7   | eBioscience 17-0081-81 |
| Anti-Mouse CD45 PE                         | 30-F11   | eBioscience 12-0451-81 |
| Anti-Mouse CD45 PerCP Cy5.5                | 30-F11   | eBioscience 45-0451-80 |
| Anti-Mouse CD45 APC                        | 30-F11   | eBioscience 17-0451-82 |
| Anti-F4/80                                 | SP115    | Novus NBP2-12506       |
